# Supplementary material for: Influential Factors of Masticatory Performance in Older Adults: A Cross-Sectional Study
Source: MDPI journal article supplement (doi:10.3390/ijerph18084286), 2021-04-18
Supplement: s1 [file s1]

**File S1: Questionnaire on periodontal disease**

- 1) Do your gums bleed sometimes? ① Yes ② No
- 2) Do your gums swell? ① Yes ② No
- 3) Do you sometimes feel like your teeth are rising? ① Yes ② No
- 4) Do you have any shaky teeth? ① Yes ② No

File S2: Questionnaire on temporomandibular disease

- 1) Do you feel pain in the jaw when you chew or open your mouth wide? ① Yes ② No
- 2) Does your jaw make a certain sound when you open your mouth? ① Yes ② No
- 3) Is it hard to open your mouth widely? ① Yes ② No
